# Supplementary material for: Development of a 3D Tissue Culture–Based High-Content Screening Platform That Uses Phenotypic Profiling to Discriminate Selective Inhibitors of Receptor Tyrosine Kinases
Source: PubMed Central journal article supplement — J Biomol Screen. 2016 Jul 7;21(9):912–22. doi: 10.1177/1087057116657269 (PMC5030728; doi:10.1177/1087057116657269), 2016-07-07
Supplement: suppl-figure.pdf [file suppl-figure.pdf]

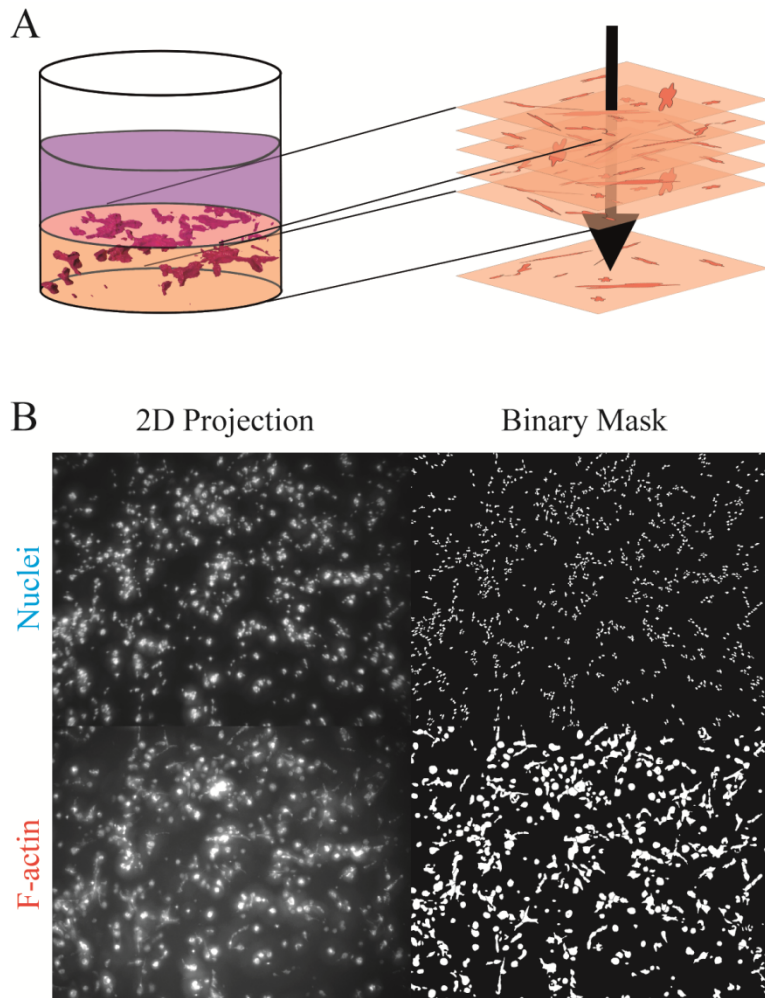

**Supplemental Figure S1: 3D cell culture based screening platform pipeline.**

- A) PC-3 cells were cultured in 384 well plate format embedded in ECM-protein hydrogels. Compound treatment was performed for 96 hours, after which the 3D cultures were stained for F-actin and nuclei . Images were obtained for both channels at different z-planes in the gel using a BD Pathway 855 imager. In-focus information of all Z-stacks was extracted by means of a 2D maximum intensity projection.
- B) Binary black and white masks were generated to define the segmented objects and were used for shape measurements. Fluorescence intensity parameters were obtained from the segmented regions of the original micrograph projection.

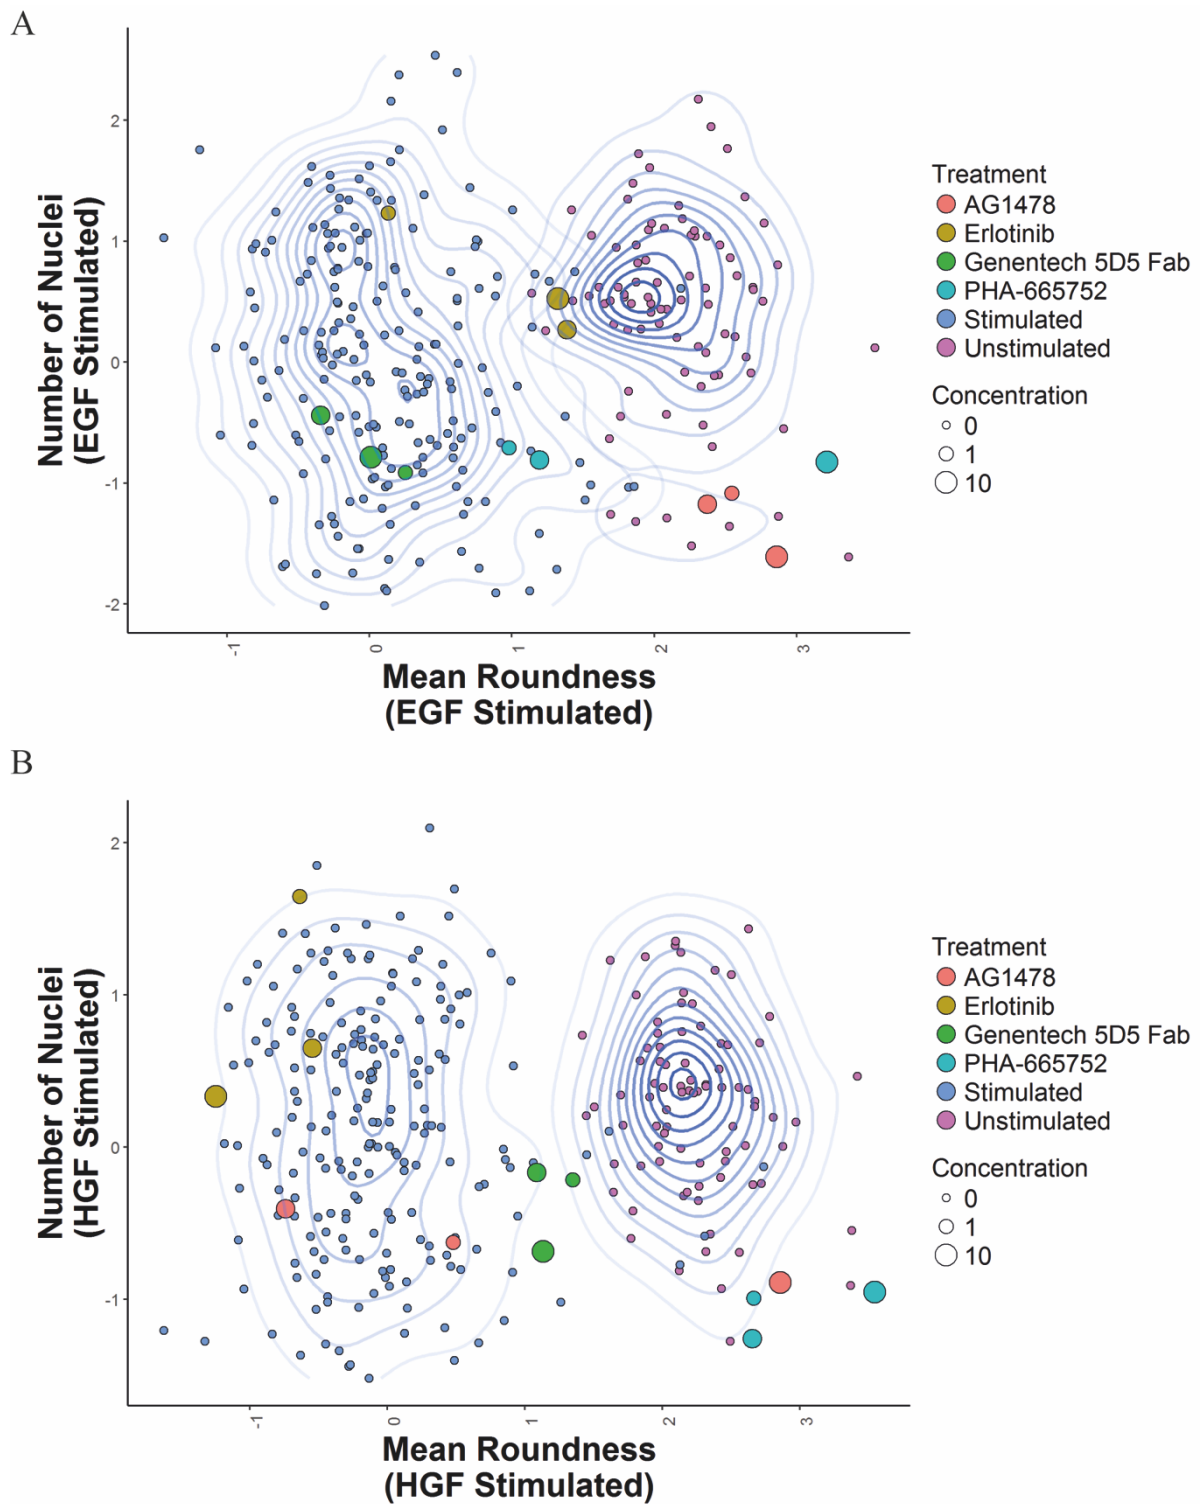

**Supplemental Figure S2:** Performance of individual phenotypic parameters to identify selective c-Met or EGFR inhibitors. A) Z-score normalized roundness and number of nuclei of tumouroids shown for EGF stimulated condition. B) Z-score normalized roundness and number of nuclei of tumouroids shown for HGF stimulated condition.

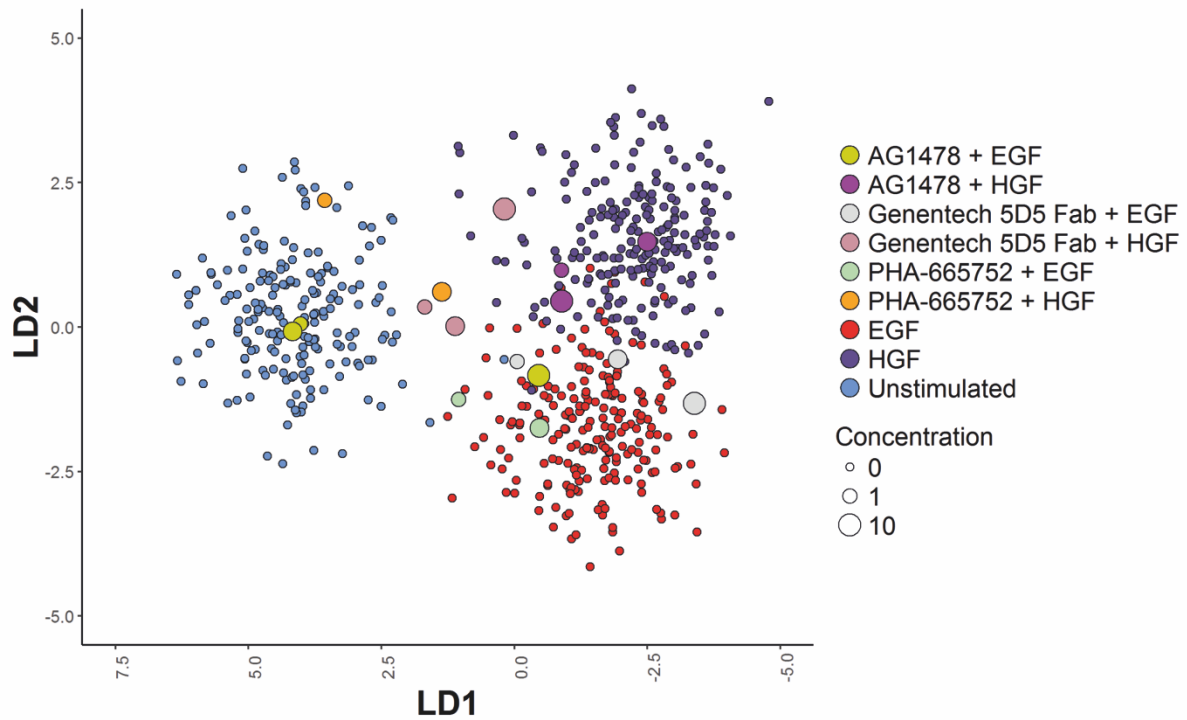

**Supplemental Figure S3:** EGF-and HGF-induced phenotypes are both characterized by invasion into the ECM, but can be differentiated using linear discriminant analysis (LDA). LDA training was performed using KNIME and RStudio (MASS package). Linear correlation filter was applied to all parameters ( $R^2 < 0.85$ ) prior to training LDA on EGF, HGF and unstimulated groups, in order to filter out the most highly collinear variables. Approximately 250 phenotypic descriptors are required to separate both phenotypes. LDA was subsequently applied to the complete dataset. Individual data points for EGF, HGF and unstimulated shown. Mean data shown for AG1478, Genentech 5D5 Fab and PHA-665752.

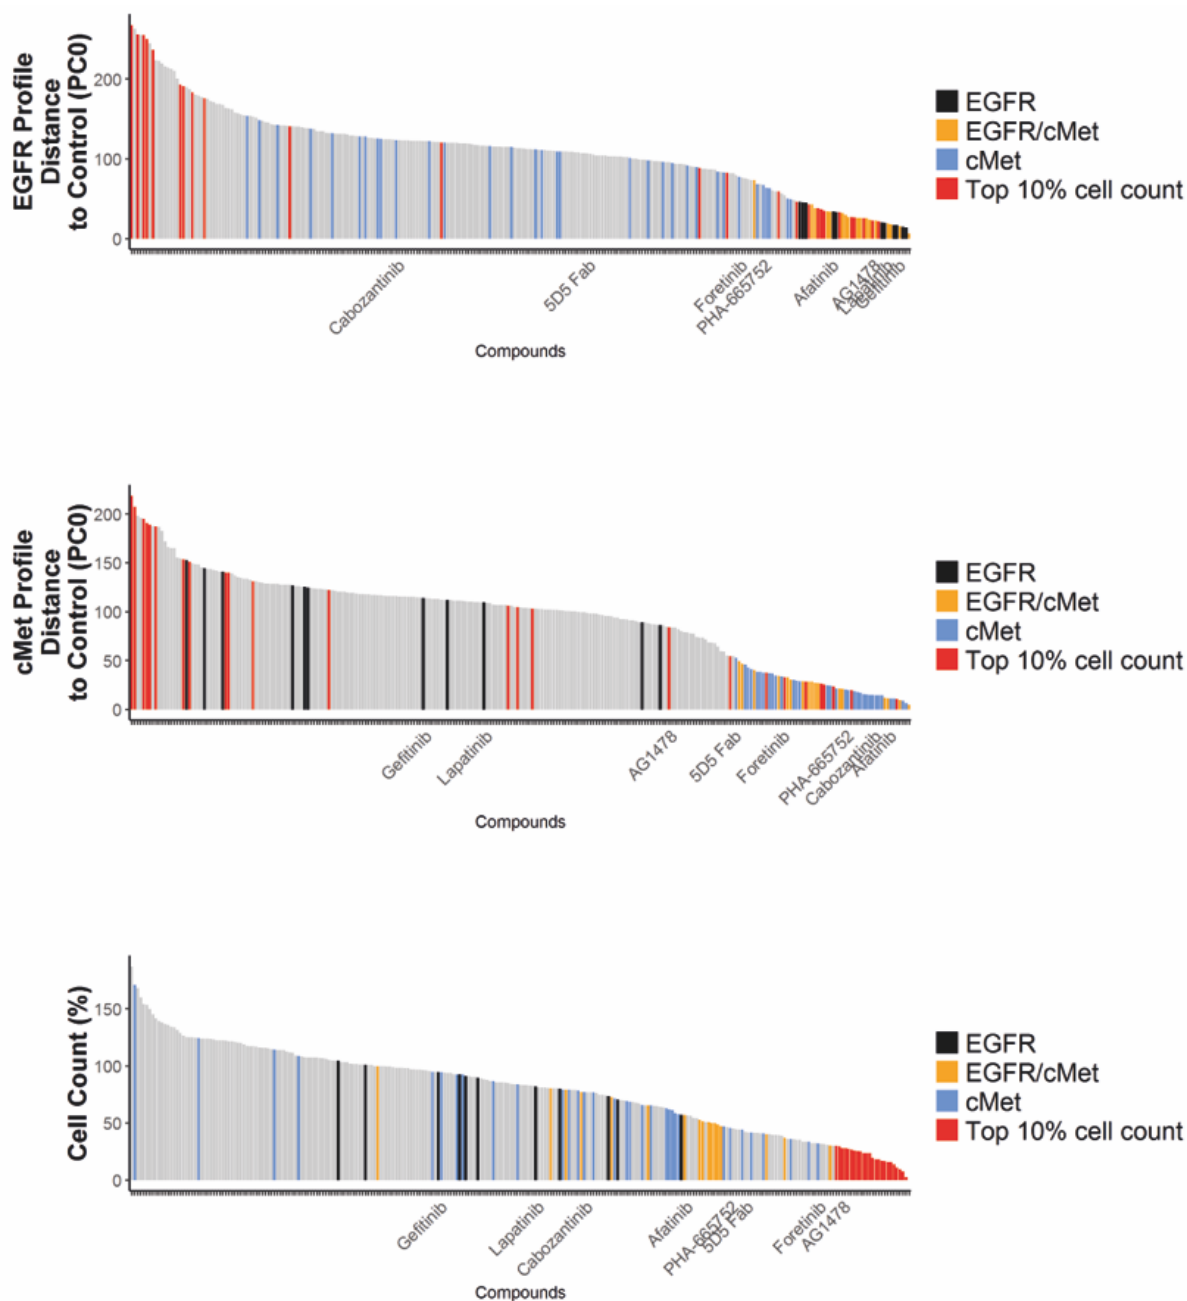

**Supplemental Figure S4:** Hit selection based on cell count does not identify selective c-Met and EGFR inhibitors. Ranking performed on cell count and on c-Met and EGFR profile, as in figure 4C, show different results.

## Supplemental table 1: Vichem compound information

| Compound ID  | References                                                                              | Core structure                   |
|--------------|-----------------------------------------------------------------------------------------|----------------------------------|
| VCC030450:22 | D.W.Fry et al. 1994 Science 265, 1093-95.                                               | quinazoline                      |
| VCC613596:10 | WO 2009104027 A1                                                                        | benzothieno[2,3-d]pyrimidine     |
| VCC912492:07 | WO 2012080727 A2                                                                        | benzothieno[2,3-d]pyrimidine     |
| VCC740005:11 | Cancer Res, Vol.65 Nr., 379-382, 2005.                                                  | quinazoline                      |
| VCC407451:10 | Bioorg Med Chem Lett, Vol.14 Nr.1, 111-114, 2004.                                       | quinazoline                      |
| VCC075648:03 | J. Med. Chem., 1999, 42, 5120-5130, Cancer Research (2003), 63(17), 5462-5469           | indol-2-one                      |
| VCC475979:01 | unpublished                                                                             | indol-2-one                      |
| VCC884444:01 | unpublished                                                                             | indol-2-one                      |
| VCC833029:24 | Bioorg Med Chem Lett, Vol.16 Nr.17, 4686-4691, 2006.                                    | quinazoline                      |
| VCC502987:01 | unpublished                                                                             | indol-2-one                      |
| VCC370686:02 | unpublished                                                                             | indol-2-one                      |
| VCC703724:02 | unpublished                                                                             | indol-2-one                      |
| VCC260084:01 | unpublished                                                                             | indol-2-one                      |
| VCC458127:03 | Bioorg. Med. Chem.Lett. 2001,11,2867-2870                                               | 4-(1H-imidazol-5-yl)pyrimidine   |
| VCC930986:01 | Tetrahedron Letters (2008), 49(7), 1269-1273.                                           | quinazoline                      |
| VCC996608:06 | Current Medicinal Chemistry (2014), 21(17), 1938-1955.                                  | quinoline                        |
| VCC398520:05 | Preparation of quinoline derivatives as AXL kinase inhibitors WO 2009127417 A1          | quinoline                        |
| VCC285946:01 | Molecular Cancer Therapeutics (2009), 8(12), 3181-3190.                                 | [1,2,4]triazolo[4,3-b]pyridazine |
| VCC055393:01 | 2008 Oncogene 27 (34), pp. 4702-4711                                                    | quinazoline                      |
| VCC131028:02 | unpublished                                                                             | quinoline                        |
| VCC098211:02 | unpublished                                                                             | <b>quinoline</b>                 |
| VCC999628:01 | unpublished                                                                             | quinoline                        |
| VCC376189:01 | ACS Medicinal Chemistry Letters (2014), 5(4), 298-303.                                  | quinoline                        |
| VCC967844:01 | ACS Medicinal Chemistry Letters (2014), 5(4), 298-303.                                  | quinoline                        |
| VCC617235:01 | unpublished                                                                             | quinoline                        |
| VCC395122:01 | ACS Medicinal Chemistry Letters (2014), 5(4), 298-303.                                  | quinoline                        |
| VCC883733:01 | ACS Medicinal Chemistry Letters (2014), 5(4), 298-303.                                  | quinoline                        |
| VCC868449:01 | ACS Medicinal Chemistry Letters (2014), 5(4), 298-303.                                  | quinoline                        |
| VCC155409:01 | ACS Medicinal Chemistry Letters (2014), 5(4), 298-303.                                  | quinoline                        |
| VCC048363:02 | Clinical Cancer Research 2009, 15, 5040, Cancer Res 2007;67(24):11924-32                | quinazoline                      |
| VCC957400:02 | ACS Medicinal Chemistry Letters (2014), 5(4), 298-303.                                  | quinoline                        |
| VCC716837:01 | ACS Medicinal Chemistry Letters (2014), 5(4), 298-303.                                  | quinoline                        |
| VCC656237:01 | unpublished                                                                             | quinoline                        |
| VCC378728:01 | ACS Medicinal Chemistry Letters (2014), 5(4), 298-303.                                  | quinoline                        |
| VCC461663:01 | unpublished                                                                             | quinoline                        |
| VCC325112:01 | ACS Medicinal Chemistry Letters (2014), 5(4), 298-303.                                  | quinoline                        |
| VCC109756:01 | ACS Medicinal Chemistry Letters (2014), 5(4), 298-303                                   | quinoline                        |
| VCC497510:01 | ACS Medicinal Chemistry Letters (2014), 5(4), 298-303.                                  | quinoline                        |
| VCC444414:01 | ACS Medicinal Chemistry Letters (2014), 5(4), 298-303.                                  | quinoline                        |
| VCC960450:01 | Clin Cancer Res. 2010 Dec 15;16(24):5936-41.                                            | quinoline                        |
| VCC450892:17 | Cancer Res. 2009 Oct 15;69(20):8009-16.                                                 | quinoline                        |
| VCC528301:01 | ACS Medicinal Chemistry Letters (2014), 5(4), 298-303.                                  | quinoline                        |
| VCC778672:01 | ACS Medicinal Chemistry Letters (2014), 5(4), 298-303.                                  | quinoline                        |
| VCC466812:01 | ACS Medicinal Chemistry Letters (2014), 5(4), 298-303.                                  | quinoline                        |
| VCC444508:05 | ACS Medicinal Chemistry Letters (2014), 5(4), 298-303.                                  | quinoline                        |
| VCC590177:01 | unpublished                                                                             | quinoline                        |
| VCC221701:01 | Preparation of benzopyrrolidone derivatives for use as GRK5 modulators WO 2015022437 A1 | indol-2-one                      |
| VCC979277:01 | Preparation of benzopyrrolidone derivatives for use as GRK5 modulators WO 2015022437 A1 | indol-2-one                      |

|                     |                                                                                         |    |                    |
|---------------------|-----------------------------------------------------------------------------------------|----|--------------------|
| <b>VCC935482:01</b> | Preparation of benzopyrrolidone derivatives for use as GRK5 modulators<br>2015022437 A1 | WO | indol-2-one        |
| <b>VCC443915:01</b> | Preparation of benzopyrrolidone derivatives for use as GRK5 modulators<br>2015022437 A1 | WO | indol-2-one        |
| <b>VCC051013:02</b> | Preparation of benzopyrrolidone derivatives for use as GRK5 modulators<br>2015022437 A1 | WO | indol-2-one        |
| <b>VCC228833:01</b> | Preparation of benzopyrrolidone derivatives for use as GRK5 modulators<br>2015022437 A1 | WO | indol-2-one        |
| <b>VCC685240:01</b> | Preparation of benzopyrrolidone derivatives for use as GRK5 modulators<br>2015022437 A1 | WO | indol-2-one        |
| <b>VCC804481:01</b> | Preparation of benzopyrrolidone derivatives for use as GRK5 modulators<br>2015022437 A1 | WO | indol-2-one        |
| <b>VCC365775:01</b> | Preparation of benzopyrrolidone derivatives for use as GRK5 modulators<br>2015022437 A1 | WO | indol-2-one        |
| <b>VCC744093:03</b> | Preparation of benzopyrrolidone derivatives for use as GRK5 modulators<br>2015022437 A1 | WO | indol-2-one        |
| <b>VCC323972:01</b> | WO 2014022116 A2 20140206                                                               |    | 4-phenoxy pyridine |
| <b>VCC353749:01</b> | Preparation of benzopyrrolidone derivatives for use as GRK5 modulators<br>2015022437 A1 | WO | indol-2-one        |
| <b>VCC317779:01</b> | WO 2014022116 A2 20140206                                                               |    | 4-phenoxy pyridine |
| <b>VCC415997:02</b> | WO 2008102870 A1                                                                        |    | 4-phenoxy pyridine |
| <b>VCC055876:02</b> | Preparation of benzopyrrolidone derivatives for use as GRK5 modulators<br>2015022437 A1 | WO | 4-phenoxy pyridine |
| <b>VCC429285:02</b> | Preparation of benzopyrrolidone derivatives for use as GRK5 modulators<br>2015022437 A1 | WO | indol-2-one        |
| <b>VCC372550:01</b> | Preparation of benzopyrrolidone derivatives for use as GRK5 modulators<br>2015022437 A1 | WO | indol-2-one        |
| <b>VCC290183:01</b> | Preparation of benzopyrrolidone derivatives for use as GRK5 modulators<br>2015022437 A1 | WO | indol-2-one        |
| <b>VCC031393:01</b> | Preparation of benzopyrrolidone derivatives for use as GRK5 modulators<br>2015022437 A1 | WO | indol-2-one        |
| <b>VCC346202:02</b> | Preparation of benzopyrrolidone derivatives for use as GRK5 modulators<br>2015022437 A1 | WO | indol-2-one        |
| <b>VCC563740:02</b> | Preparation of benzopyrrolidone derivatives for use as GRK5 modulators<br>2015022437 A1 | WO | indol-2-one        |
| <b>VCC180368:02</b> | unpublished                                                                             |    | quinoline          |
| <b>VCC239215:01</b> | unpublished                                                                             |    | 4-phenoxy pyridine |
| <b>VCC898902:01</b> | unpublished                                                                             |    | 4-phenoxy pyridine |
| <b>VCC733981:01</b> | unpublished                                                                             |    | 4-phenoxy pyridine |
| <b>VCC656576:02</b> | unpublished                                                                             |    | 4-phenoxy pyridine |
| <b>VCC034014:01</b> | unpublished                                                                             |    | 4-phenoxy pyridine |
| <b>VCC132459:01</b> | unpublished                                                                             |    | 4-phenoxy pyridine |
| <b>VCC692601:01</b> | unpublished                                                                             |    | 4-phenoxy pyridine |
| <b>VCC581800:03</b> | unpublished                                                                             |    | quinoline          |
| <b>VCC232089:02</b> | Preparation of benzopyrrolidone derivatives for use as GRK5 modulators<br>2015022437 A1 | WO | indol-2-one        |
| <b>VCC650454:03</b> | Preparation of benzopyrrolidone derivatives for use as GRK5 modulators<br>2015022437 A1 | WO | indol-2-one        |
| <b>VCC227946:01</b> | Preparation of benzopyrrolidone derivatives for use as GRK5 modulators<br>2015022437 A1 | WO | indol-2-one        |

**Supplemental table 2: Hit selection phenotypic screen**

| Vichen ID    | 1 $\mu$ M          | 3.16 $\mu$ M       | 10 $\mu$ M         |
|--------------|--------------------|--------------------|--------------------|
| VCC030450:22 | EGFR               | EGFR               | EGFR               |
| VCC031393:01 | Top 10% cell count | None               | cMet               |
| VCC034014:01 | None               | None               | None               |
| VCC048363:02 | EGFR               | EGFR               | EGFR/cMet          |
| VCC051013:02 | Top 10% cell count | Top 10% cell count | None               |
| VCC055393:01 | EGFR/cMet          | EGFR/cMet          | EGFR/cMet          |
| VCC055876:02 | None               | None               | None               |
| VCC075648:03 | None               | None               | None               |
| VCC098211:02 | None               | None               | None               |
| VCC109756:01 | cMet               | cMet               | cMet               |
| VCC131028:02 | None               | None               | None               |
| VCC132459:01 | None               | None               | None               |
| VCC155409:01 | None               | None               | EGFR/cMet          |
| VCC180368:02 | None               | None               | None               |
| VCC221701:01 | None               | None               | None               |
| VCC227946:01 | None               | None               | EGFR/cMet          |
| VCC228833:01 | None               | None               | Top 10% cell count |
| VCC232089:02 | None               | None               | Top 10% cell count |
| VCC239215:01 | None               | None               | None               |
| VCC260084:01 | None               | None               | None               |
| VCC285946:01 | None               | cMet               | cMet               |
| VCC290183:01 | None               | None               | None               |
| VCC31779:01  | None               | None               | None               |
| VCC323972:01 | None               | None               | None               |
| VCC325112:01 | None               | None               | None               |
| VCC346202:02 | Top 10% cell count | Top 10% cell count | Top 10% cell count |
| VCC353749:01 | None               | None               | None               |
| VCC365775:01 | None               | None               | cMet               |
| VCC370686:02 | None               | None               | None               |
| VCC372550:01 | None               | None               | None               |
| VCC376189:01 | cMet               | cMet               | EGFR/cMet          |
| VCC378728:01 | None               | EGFR               | None               |
| VCC395122:01 | None               | None               | cMet               |
| VCC398520:05 | None               | None               | None               |
| VCC407451:10 | None               | EGFR               | EGFR               |
| VCC415997:02 | cMet               | cMet               | cMet               |
| VCC429285:02 | None               | None               | EGFR/cMet          |
| VCC443915:01 | Top 10% cell count | None               | cMet               |
| VCC444414:01 | cMet               | cMet               | cMet               |
| VCC444508:05 | None               | None               | Top 10% cell count |
| VCC450892:17 | cMet               | cMet               | cMet               |
| VCC458127:03 | None               | None               | EGFR/cMet          |
| VCC461663:01 | None               | None               | None               |
| VCC466812:01 | None               | None               | None               |
| VCC475979:01 | None               | None               | Top 10% cell count |
| VCC497510:01 | cMet               | cMet               | EGFR/cMet          |
| VCC502987:01 | None               | None               | EGFR/cMet          |
| VCC528301:01 | None               | None               | EGFR/cMet          |
| VCC563740:02 | None               | Top 10% cell count | None               |
| VCC581800:03 | cMet               | cMet               | cMet               |
| VCC590177:01 | None               | None               | None               |
| VCC613596:10 | None               | None               | None               |
| VCC617235:01 | None               | None               | None               |
| VCC650454:03 | Top 10% cell count | Top 10% cell count | Top 10% cell count |
| VCC656237:01 | None               | None               | None               |
| VCC656576:02 | None               | None               | None               |
| VCC685240:01 | None               | None               | cMet               |
| VCC692601:01 | None               | None               | None               |
| VCC703724:02 | None               | None               | None               |
| VCC716837:01 | None               | None               | Top 10% cell count |
| VCC733981:01 | None               | None               | None               |
| VCC740005:11 | None               | EGFR               | EGFR               |
| VCC744093:01 | None               | None               | None               |
| VCC744093:03 | None               | Top 10% cell count | EGFR/cMet          |
| VCC778672:01 | None               | None               | None               |
| VCC804481:01 | None               | None               | Top 10% cell count |
| VCC833029:24 | None               | None               | EGFR               |
| VCC868449:01 | None               | None               | EGFR/cMet          |
| VCC883733:01 | None               | None               | None               |
| VCC884444:01 | None               | None               | Top 10% cell count |
| VCC898902:01 | None               | None               | None               |
| VCC912492:07 | None               | None               | None               |
| VCC930986:01 | None               | None               | None               |
| VCC935482:01 | None               | None               | None               |
| VCC957400:02 | None               | None               | Top 10% cell count |
| VCC960450:01 | cMet               | cMet               | cMet               |
| VCC967844:01 | None               | None               | None               |
| VCC979277:01 | None               | None               | EGFR/cMet          |
| VCC996608:06 | None               | None               | Top 10% cell count |
| VCC999628:01 | None               | None               | None               |

**Supplemental table 3: Enzyme activity measurement (% inhibition)**

| Vicem Compound-ID | EGFR Inh (%) 10µM | EGFR Inh (%) 1µM | EGFR Inh (%) 0.1µM | c-Met Inh (%) 10µM | c-Met Inh (%) 1µM | c-Met Inh (%) 0.1µM |
|-------------------|-------------------|------------------|--------------------|--------------------|-------------------|---------------------|
| VCC030450:22      | 101               | 99               | 97                 | 4                  | 2                 | 0                   |
| VCC031393:01      | 11                | 2                |                    | 16                 | 0                 |                     |
| VCC034014:01      | 18                | 3                |                    | 2                  | 5                 |                     |
| VCC048363:02      | 101               | 100              | 97                 | 1                  | -2                | -1                  |
| VCC051013:02      | 16                | 0                |                    | 41                 | 6                 |                     |
| VCC055393:01      | 99                | 100              | 100                | 3                  | 3                 | -4                  |
| VCC055876:02      | -2                | -9               |                    | 22                 | -1                |                     |
| VCC075648:03      | 66                | 13               |                    | 41                 | 6                 |                     |
| VCC098211:02      | 47                | 7                |                    | 26                 | 1                 |                     |
| VCC109756:01      | 43                | 7                | 2                  | 93                 | 61                | 7                   |
| VCC131028:02      | 30                | -2               |                    | 12                 | -4                |                     |
| VCC132459:01      | 6                 | 0                |                    | 7                  | 0                 |                     |
| VCC155409:01      | 76                | 34               | 10                 | 25                 | 2                 | -2                  |
| VCC180368:02      | 92                | 83               |                    | 35                 | 7                 |                     |
| VCC221701:01      | 22                | 4                |                    | 22                 | 1                 |                     |
| VCC227946:01      | 8                 |                  |                    |                    |                   |                     |
| VCC228833:01      | 16                | 1                | 0                  | 4                  | 0                 | -2                  |
| VCC232089:02      | 69                |                  |                    |                    |                   |                     |
| VCC239215:01      | 17                | 4                |                    | 16                 | 4                 |                     |
| VCC260084:01      | 8                 | 3                |                    | 2                  | 1                 |                     |
| VCC285946:01      | 32                | 0                | 9                  | 84                 | 49                | 8                   |
| VCC290183:01      | 16                | 4                |                    | 27                 | 3                 |                     |
| VCC317779:01      | 3                 | -1               |                    | 82                 | 18                |                     |
| VCC323972:01      | -2                | -8               |                    | 19                 | 4                 |                     |
| VCC325112:01      | 59                | 16               |                    | 44                 | 5                 |                     |
| VCC346202:02      | 3                 | 1                |                    | 25                 | 2                 |                     |
| VCC353749:01      | 5                 | 1                |                    | 26                 | 1                 |                     |
| VCC365775:01      | 13                | 4                |                    | 36                 | 5                 |                     |
| VCC370686:02      | -4                | -8               |                    | 2                  | -3                |                     |
| VCC372550:01      | -12               | -9               |                    | 2                  | -2                |                     |
| VCC376189:01      | 12                | 2                | -2                 | 83                 | 56                | 9                   |
| VCC378728:01      | 85                | 41               | 8                  | 72                 | 16                | 0                   |
| VCC395122:01      | 93                | 69               | 10                 | 52                 | 2                 | -3                  |
| VCC398520:05      | 98                | 55               |                    | 87                 | 30                |                     |
| VCC407451:10      | 93                | 92               | 73                 | 7                  | 0                 | -4                  |
| VCC415997:02      | -11               | -11              | -7                 | 95                 | 77                | 14                  |
| VCC429285:02      | 3                 | 2                | 0                  | 6                  | -2                | 2                   |
| VCC443915:01      | 23                | 3                |                    | 27                 | 1                 |                     |
| VCC444414:01      | 7                 | -4               | -6                 | 90                 | 47                | 3                   |
| VCC444508:05      | 100               | 93               |                    | 41                 | 8                 |                     |
| VCC450892:17      | 32                | 10               | 5                  | 85                 | 39                | 4                   |
| VCC458127:03      | 95                | 62               |                    | 3                  | 0                 |                     |
| VCC461663:01      | 88                | 43               |                    | 51                 | 7                 |                     |
| VCC466812:01      | 102               | 84               |                    | 67                 | 13                |                     |
| VCC475979:01      | 20                | 10               |                    | 14                 | 1                 |                     |
| VCC497510:01      | 20                | 10               | 2                  | 90                 | 54                | 9                   |
| VCC502987:01      | 19                | 9                | 1                  | 4                  | 1                 | 0                   |
| VCC528301:01      | 94                | 82               | 29                 | 37                 | 7                 | 1                   |
| VCC563740:02      | 15                | 10               |                    | 25                 | 5                 |                     |
| VCC581800:03      | 50                |                  |                    | 100                |                   |                     |
| VCC590177:01      | 94                | 67               |                    | 56                 | 3                 |                     |
| VCC613596:10      | 91                | 55               |                    | 0                  | -1                |                     |
| VCC617235:01      | 80                | 25               |                    | 37                 | 4                 |                     |
| VCC650454:03      | 39                |                  |                    |                    |                   |                     |
| VCC656237:01      | 81                | 43               |                    | 43                 | 8                 |                     |
| VCC656576:02      | -2                | -7               | -13                | 0                  | -4                | -4                  |
| VCC685240:01      | 10                | -6               |                    | 4                  | 1                 |                     |
| VCC692601:01      | 5                 | 4                |                    | 20                 | 7                 |                     |
| VCC703724:02      | 9                 | 9                |                    | 7                  | 4                 |                     |
| VCC716837:01      | 48                | 10               | 1                  | 41                 | 6                 | 0                   |
| VCC733981:01      | 9                 | 5                |                    | 8                  | 1                 |                     |
| VCC740005:11      | 105               | 102              | 93                 | 11                 | 1                 | 3                   |
| VCC744093:03      | 77                | 25               | 3                  | 27                 | -1                | -1                  |
| VCC778672:01      | 101               | 85               |                    | 56                 | 9                 |                     |
| VCC804481:01      | 3                 | 5                |                    | 12                 | 0                 |                     |
| VCC833029:24      | 97                | 90               | 37                 | -3                 | 0                 | 0                   |
| VCC868449:01      | 95                | 89               | 37                 | 56                 | 14                | 3                   |
| VCC883733:01      | 81                | 40               |                    | 42                 | 12                |                     |
| VCC884444:01      | 2                 | -9               |                    | 3                  | -2                |                     |
| VCC898902:01      | 7                 | 4                |                    | 5                  | 0                 |                     |
| VCC912492:07      | 87                | 47               |                    | 2                  | -1                |                     |
| VCC930986:01      | 92                | 49               |                    | 0                  | -2                |                     |
| VCC935482:01      | -3                | -2               |                    | -1                 | -3                |                     |
| VCC957400:02      | 83                | 37               |                    | 25                 | 0                 |                     |
| VCC960450:01      | -11               | -7               | -10                | 87                 | 50                | 11                  |
| VCC967844:01      | 87                | 33               |                    | 39                 | 6                 |                     |
| VCC979277:01      | 12                | 5                |                    | 17                 | 3                 |                     |
| VCC996608:06      | 96                | 58               |                    | 81                 | 26                |                     |
| VCC999628:01      | 26                | 0                |                    | 14                 | 1                 |                     |
